# Supplementary material
Source: bioRxiv or medRxiv preprint supplement (https://www.biorxiv.org/highwire/filestream/53728/field_highwire_adjunct_files/6/178806-2.pdf)
Supplement: Supplementary file [file 178806-2.pdf]

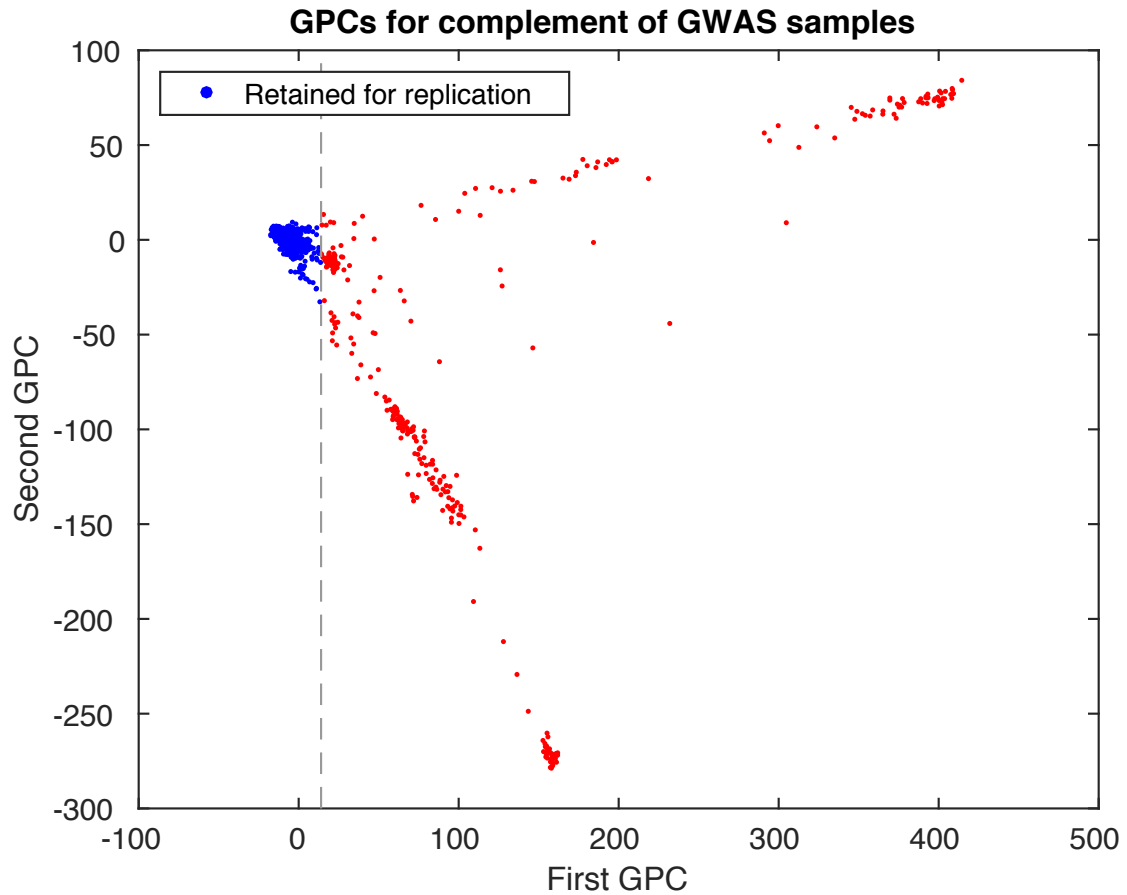

**Supplementary Figure S2. Identification of replication samples.** The plot shows the 1<sup>st</sup> and 2<sup>nd</sup> genetic data principal component scores (GPCs) for the 1,279 samples that were left out of the main discovery sample set. The cluster of points around the (0,0) point corresponds to participants with predominantly European ancestry. We set a threshold at 14 for the 1<sup>st</sup> GPC to identify a set of European samples.
